# Supplementary material for: OVISNOST O INTERNETU MEĐU SREDNJOŠKOLCIMA
Source: Royal Society of Chemistry journal article supplement (doi:10.1039/c3dt51593a), 2014-05-30
Supplement: c3dt51593a.pdf [file c3dt51593a.pdf]

## Electronic Supplementary Information (ESI)

### An INHIBIT logic gate from thiophene derivative using iron and zinc ions as input: Tuning the efficiency on moving from naphthalene to anthracene to pyrene for green luminescent detection of intracellular iron

Arnab Banerjee<sup>a</sup>, Animesh Sahana<sup>a</sup>, Sudipta Das<sup>a</sup>, Sisir Lohar<sup>a</sup>, Bidisha Sarkar<sup>b</sup>, Subhra Kanti Mukhopadhyay<sup>b</sup>, Jesús Sanmartín Matalobos<sup>c\*</sup> and Debasis Das<sup>a\*</sup>

<sup>a</sup>*Department of Chemistry, The University of Burdwan, Burdwan, West Bengal, India*

<sup>b</sup>*Department of Microbiology, The University of Burdwan, Burdwan – 713104, West Bengal, India,*

<sup>c</sup>*Departamento de Química Inorgánica, Facultad de Química, Avda. Das Ciencias s/n, 15782, Santiago de Compostela, Spain.*

Debasis Das <e-mail: [ddas100in@yahoo.com](mailto:ddas100in@yahoo.com)>; Tel: +91-342-2533913; Fax: +91-342-2530452

#### 1. Calculation of Quantum Yield

Fluorescence quantum yields ( $\Phi$ ) were estimated by integrating the area under the fluorescence curves using the equation<sup>1</sup>,

$$\phi_{\text{sample}} = \phi_{\text{ref}} \times \frac{\text{OD}_{\text{ref}} \times A_{\text{sample}} \times \epsilon_{\text{sample}}}{\text{OD}_{\text{sample}} \times A_{\text{ref}} \times \epsilon_{\text{ref}}}$$

where  $A$  was the area under the fluorescence spectra and  $OD$  was optical density of the compound at the excitation wavelength. Anthracene has been used as quantum yield standard (quantum yield is 0.27 in ethanol)<sup>2</sup> for measuring the quantum yields of **PTA** and its

Zn<sup>2+</sup> adduct. For [PTA- Fe<sup>3+</sup>] adduct, tris(2,2'-bipyridyl)ruthenium(II) ( $\Phi = 0.042$  in water) has been used.<sup>3</sup>

## 2. Calculation of detection limit

To determine the detection limit, fluorescence titration of PTA with Fe<sup>3+</sup> is carried out by adding aliquots of micro-molar concentration of Fe<sup>3+</sup>. From the concentration at which there was a sharp change in the fluorescence intensity multiplied with the concentration of PTA gave the detection limit.<sup>4</sup>

## 3. Equations used for calculating detection limit (DL)

$$DL = C_L \times C_T$$

$C_L$  = Conc. of PTA;  $C_T$  = Conc. of iron at which fluorescence enhanced.

Thus;

$$DL = 1 \mu\text{M} \times 0.01 \mu\text{M} = 0.01 \mu\text{M} = 1 \times 10^{-8} \text{ M}$$

## 4. X-ray crystal structural parameters

| Crystal parameters | PTA                                | ANTA                               |
|--------------------|------------------------------------|------------------------------------|
| Molecular formula  | C <sub>22</sub> H <sub>15</sub> NS | C <sub>20</sub> H <sub>15</sub> NS |
| Formula weight     | 325.41                             | 301.39                             |
| Crystal system     | Monoclinic                         | Monoclinic                         |
| Space group        | <i>P2<sub>1</sub>/c</i>            | <i>P2<sub>1</sub>/c</i>            |
| <i>a</i> /Å        | 12.6935 (18)                       | 4.3718 (4)                         |
| <i>b</i> /Å        | 9.3300 (12)                        | 13.1396 (12)                       |
| <i>c</i> /Å        | 13.2778 (17)                       | 25.912 (2)                         |

|                          |                    |                    |
|--------------------------|--------------------|--------------------|
| $\alpha/^\circ$          | 90.0               | 90.0               |
| $\beta/^\circ$           | 95.55 (1)          | 93.433 (5)         |
| $\gamma/^\circ$          | 90.0               | 90.0               |
| Z                        | 4                  | 4                  |
| $V/\text{\AA}^3$         | 1565.1 (4)         | 1485.8 (2)         |
| T/K                      | 100                | 100                |
| $\lambda/\text{\AA}$     | 0.7107             | 0.7107             |
| $\rho/\text{mg m}^{-3}$  | 1.381              | 1.347              |
| $\mu/\text{mm}^{-1}$     | 0.21               | 0.21               |
| Crystal size/mm          | 0.68 × 0.37 × 0.02 | 0.52 × 0.11 × 0.08 |
| $h/k/l$                  | -15→15/0→11/0→16   | -5→5/0→16/0→32     |
| $F(000)$                 | 680                | 632                |
| $\theta$ range/ $^\circ$ | 2.7–24.5 $^\circ$  | 2.2–26 $^\circ$    |
| $T_{min}$ and $T_{max}$  | 0.607 and 1.0      | 0.953 and 1.0      |
| Reflection collected     | 33038              | 22444              |
| Independent reflection   | 3092               | 3068               |
| R factor (all data)      | 0.058              | 0.037              |
| R factor (final)         | 0.150              | 0.096              |

### Geometry

All s.u.'s (except the s.u. in the dihedral angle between two l.s. planes) are estimated using the full covariance matrix. The cell s.u.'s are taken into account individually in the estimation of s.u.'s in distances, angles and torsion angles; correlations between s.u.'s in cell parameters are only used

when they are defined by crystal symmetry. An approximate (isotropic) treatment of cell s.u.'s is used for estimating s.u.'s involving l.s. planes.

### Refinement

Refinement of F2 against ALL reflections. The weighted R-factor wR and goodness of fit S are based on F2, conventional R-factors R are based on F, with F set to zero for negative F2. The threshold expression of  $F2 > 2\sigma(F2)$  is used only for calculating R factors(gt) etc. and is not relevant to the choice of reflections for refinement. R-factors based on F2 are statistically about twice as large as those based on F, and R- factors based on ALL data will be even larger.

### Figures

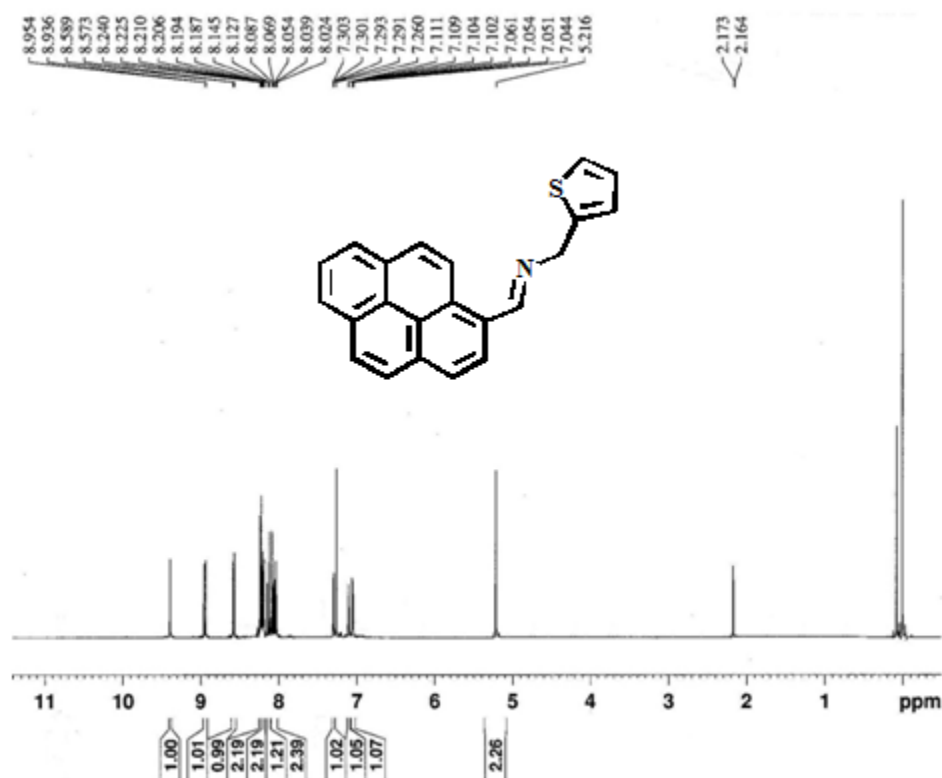

Figure S1. <sup>1</sup>H NMR spectrum of PTA in CDCl<sub>3</sub>

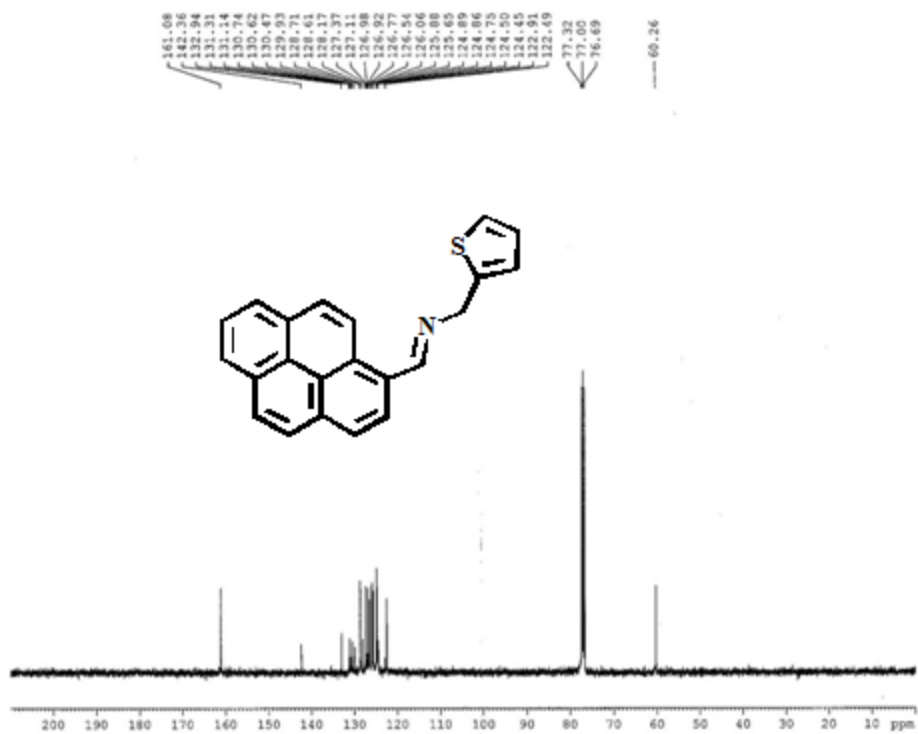

**Figure S2.**  $^{13}\text{C}$  NMR spectrum of PTA in  $\text{CDCl}_3$

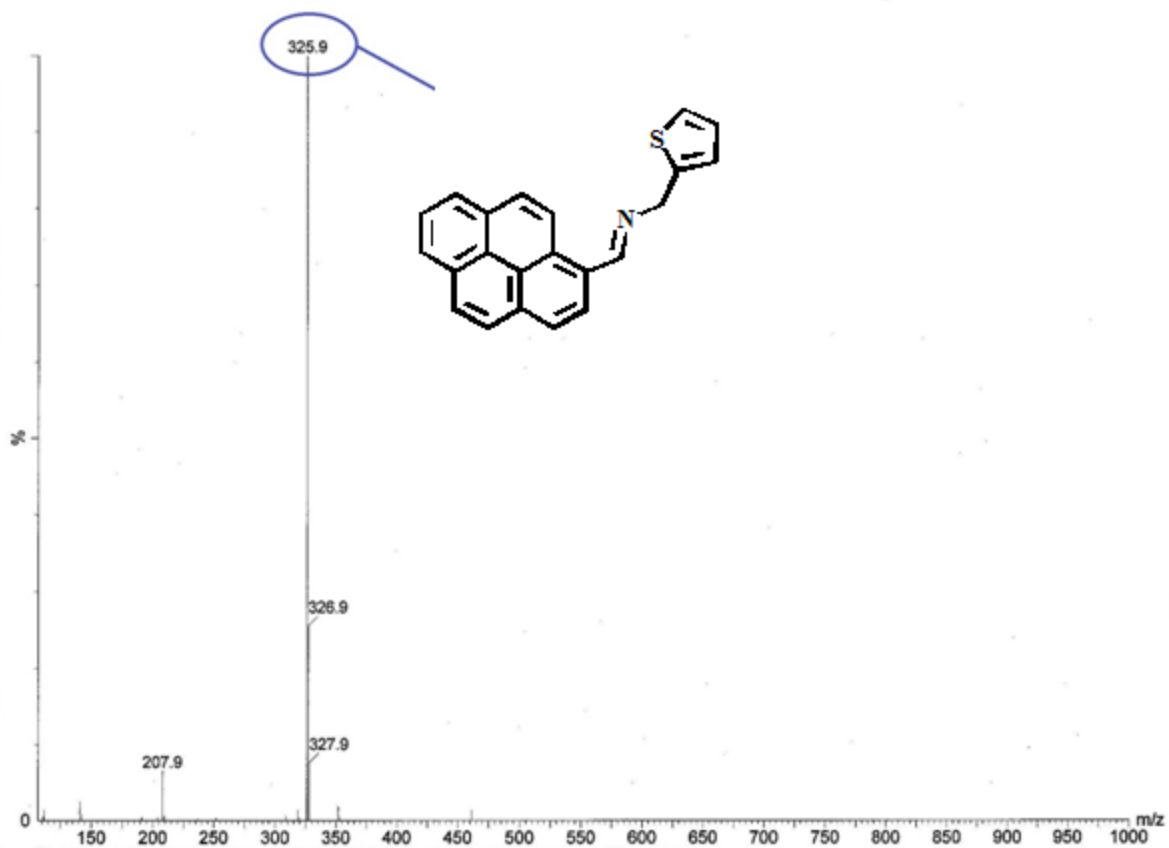

**Figure S3.** QTOF-MS ES<sup>+</sup> spectrum of PTA

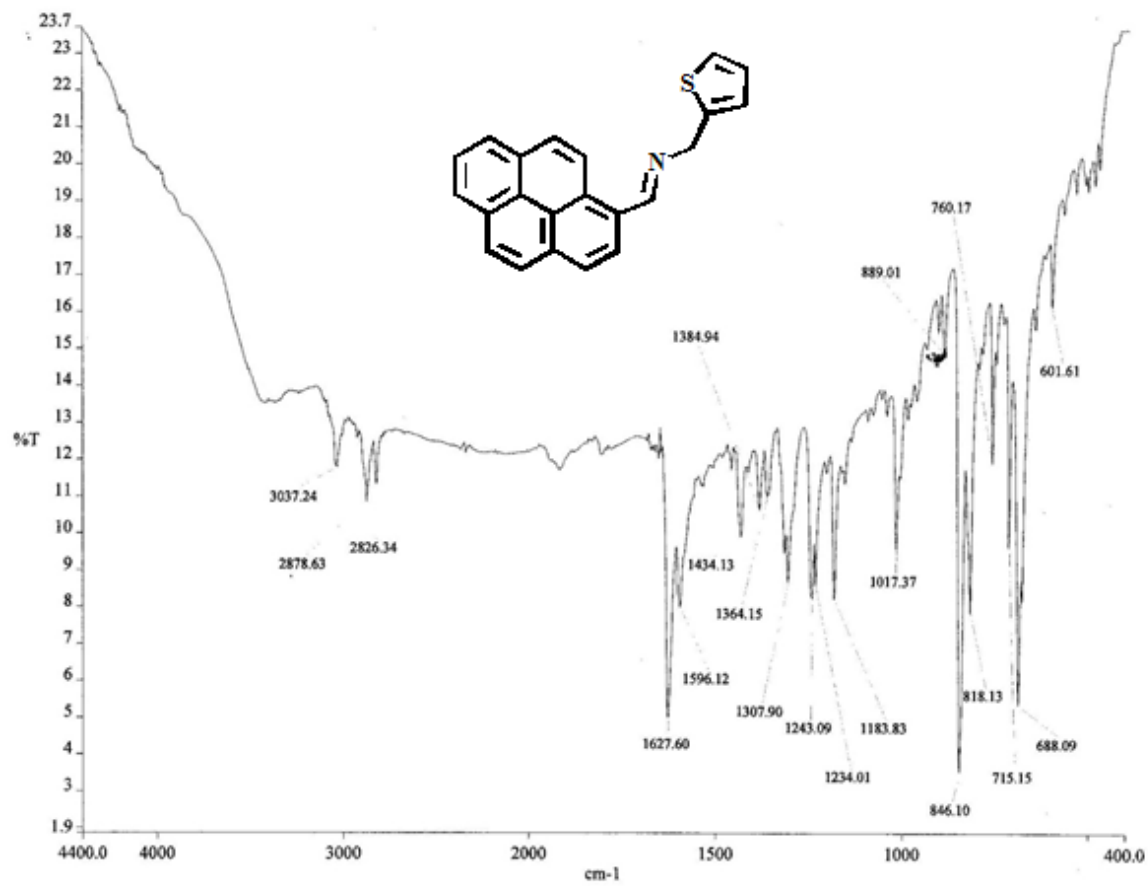

**Figure S4.** FTIR spectrum of PTA

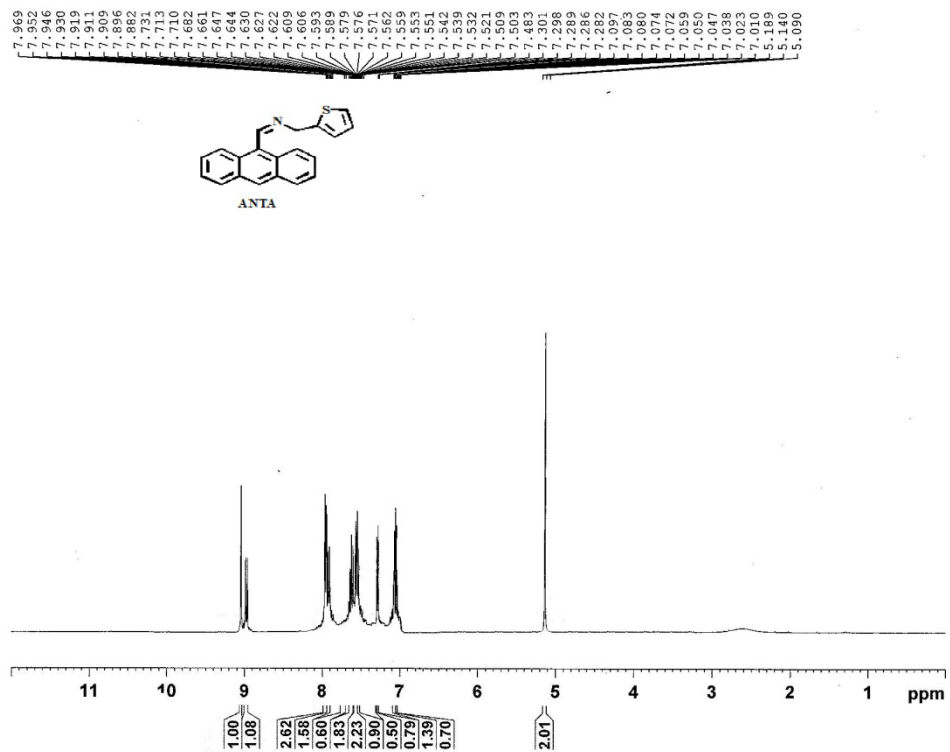

Figure S5. <sup>1</sup>H NMR spectrum of ANTA in CDCl<sub>3</sub>



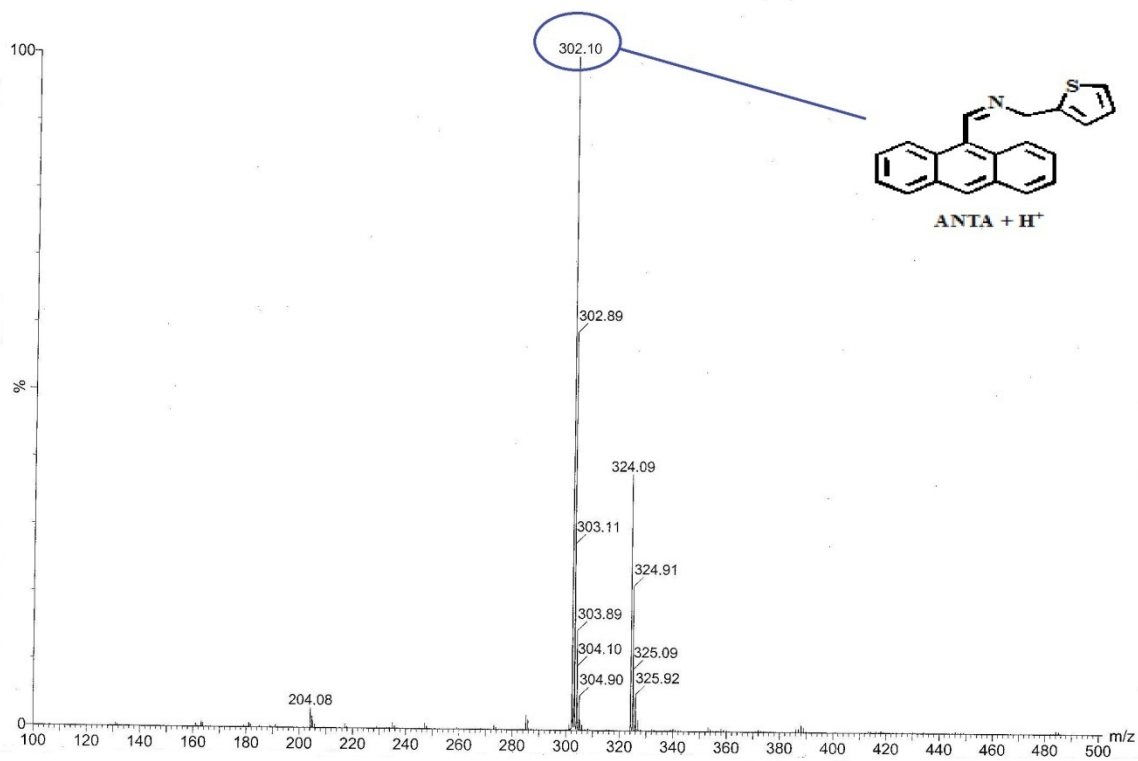

**Figure S6.** QTOF-MS ES<sup>+</sup> spectrum of ANTA

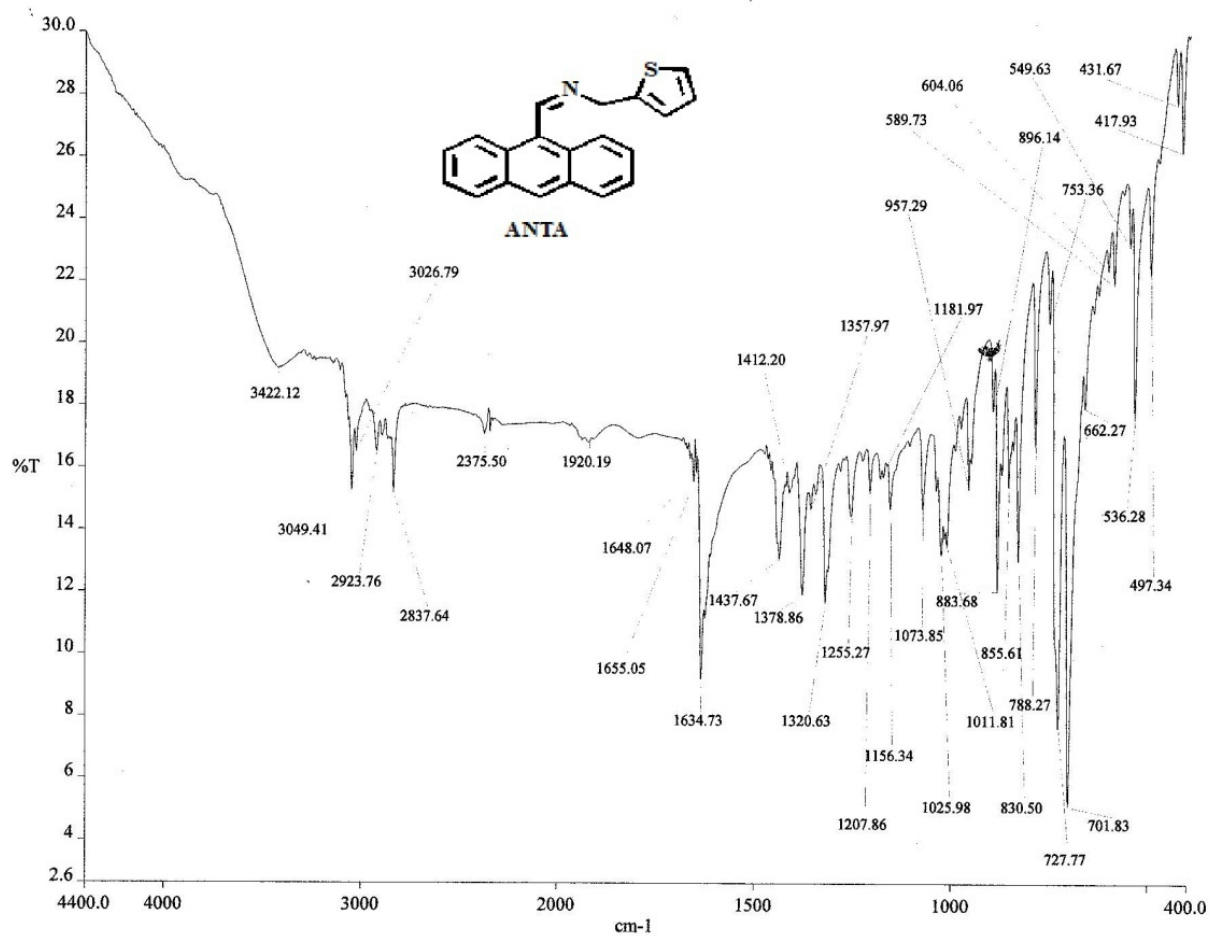

Figure S7. FTIR spectrum of ANTA

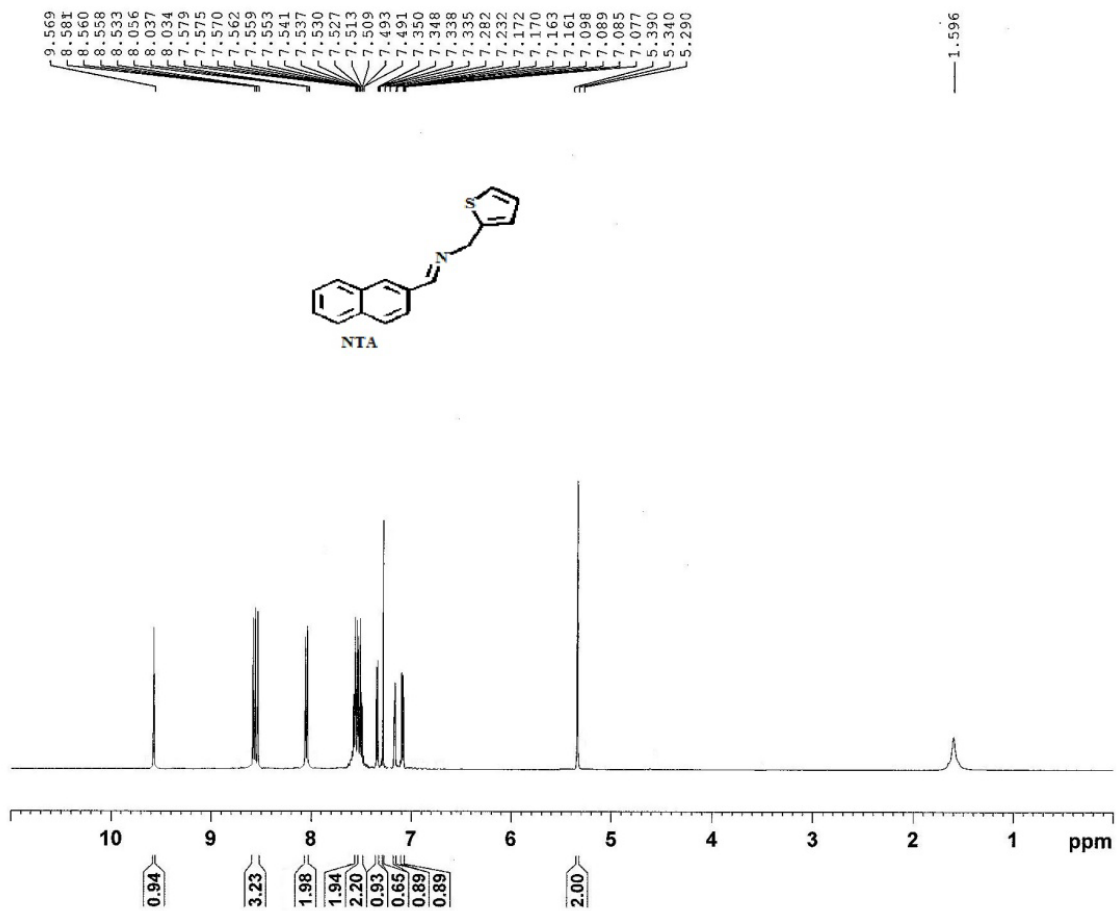

**Figure S8.** <sup>1</sup>H NMR spectrum of NTA in CDCl<sub>3</sub>

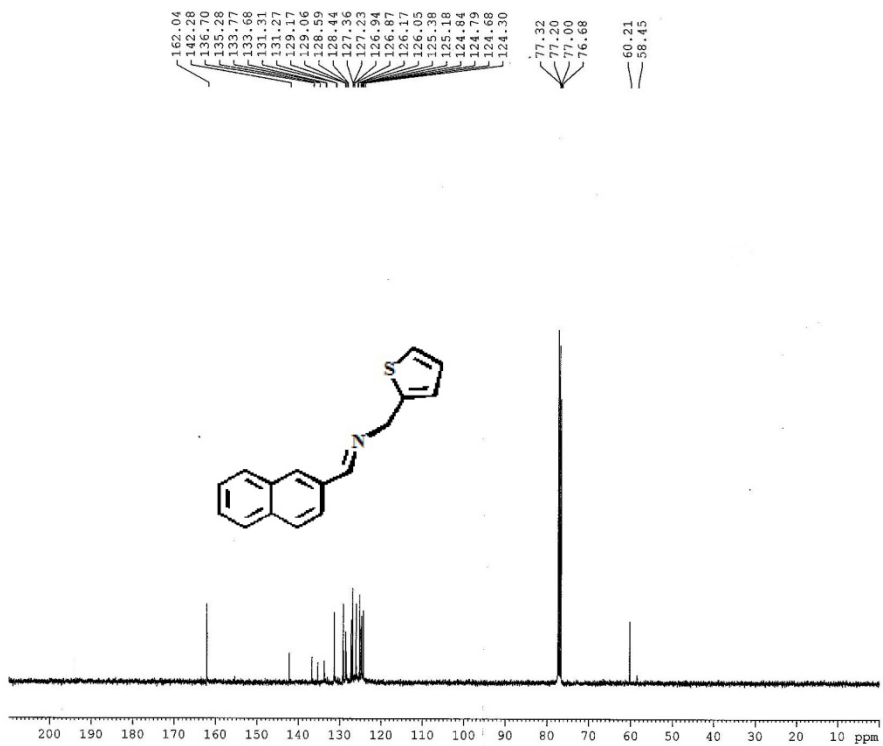

**Figure S9.** <sup>13</sup>C NMR spectrum of NTA in CDCl<sub>3</sub>

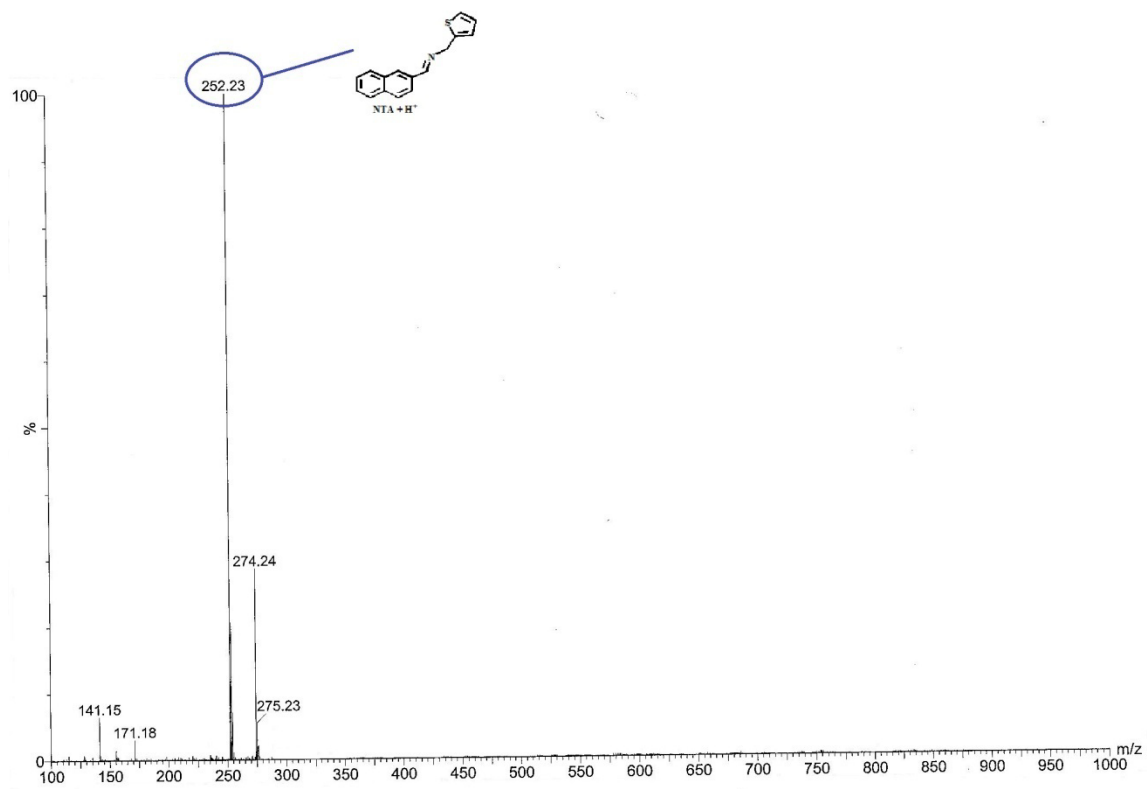

**Figure S10.** QTOF –MS ES<sup>+</sup> spectrum of NTA

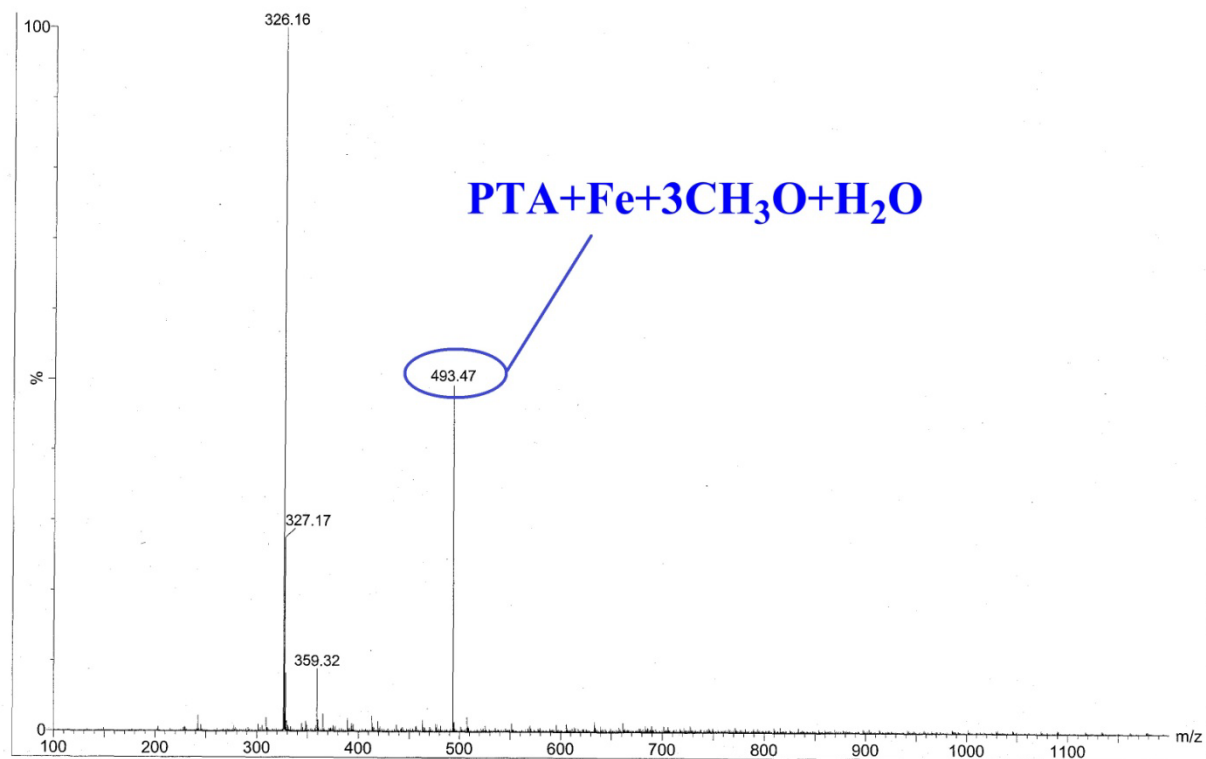

**Figure S11.** QTOF-MS ES<sup>+</sup> spectrum of [PTA-Fe<sup>3+</sup>] adduct

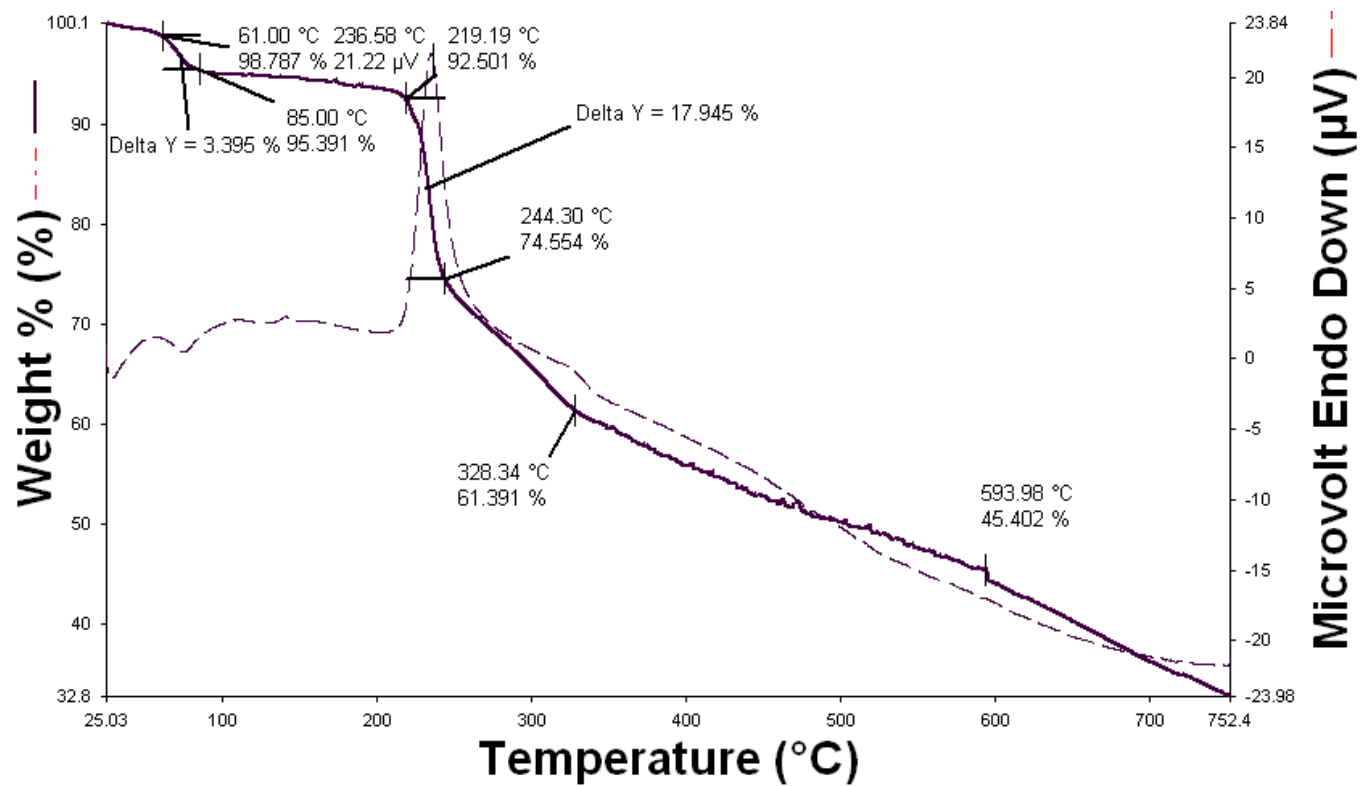

Figure S12. Thermogram of the  $[\text{PTA-Fe}^{3+}]$  adduct

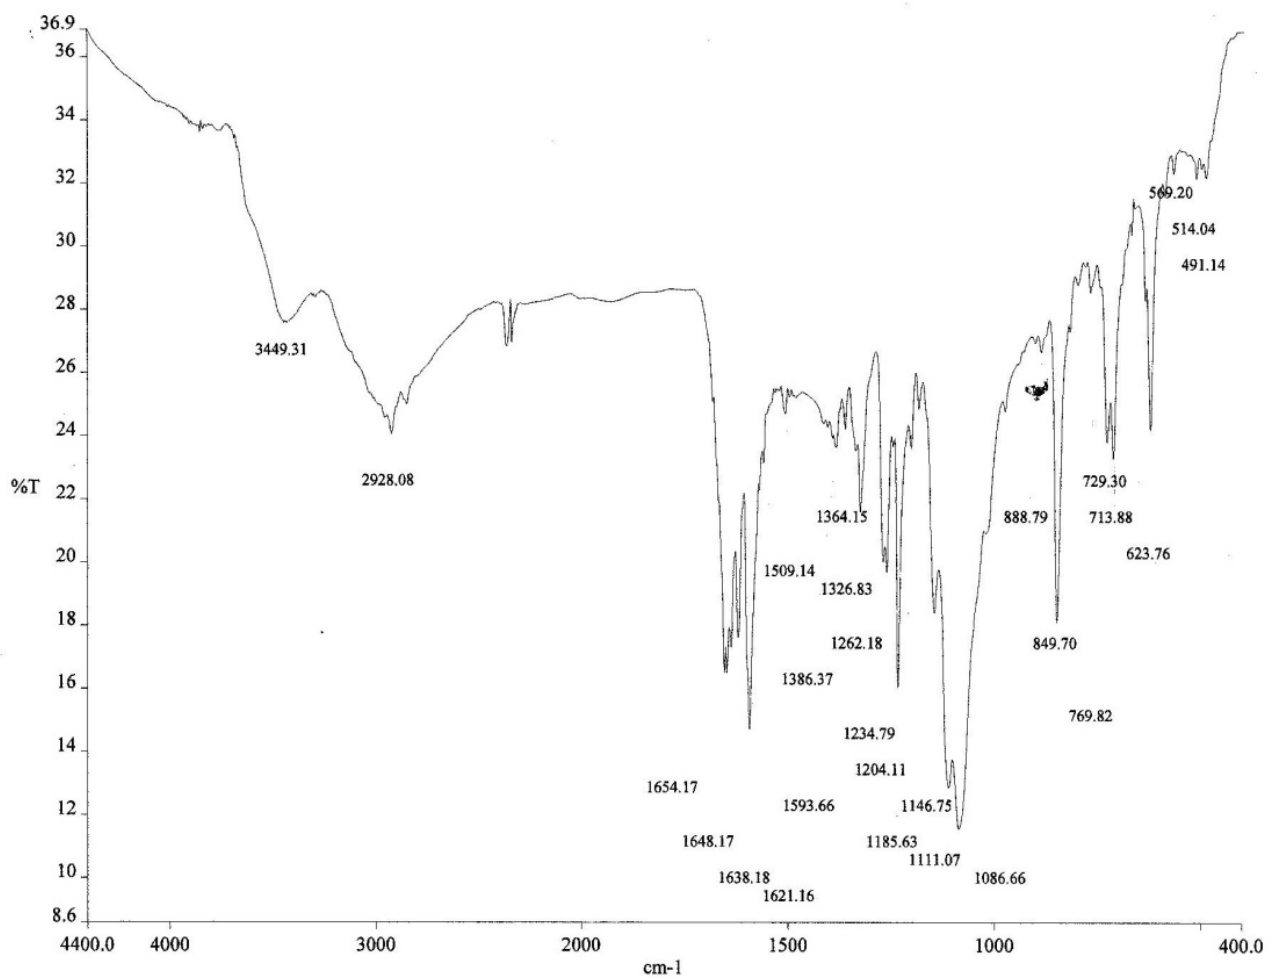

**Figure S13.** FTIR spectrum of the [PTA-Fe<sup>3+</sup>] adduct



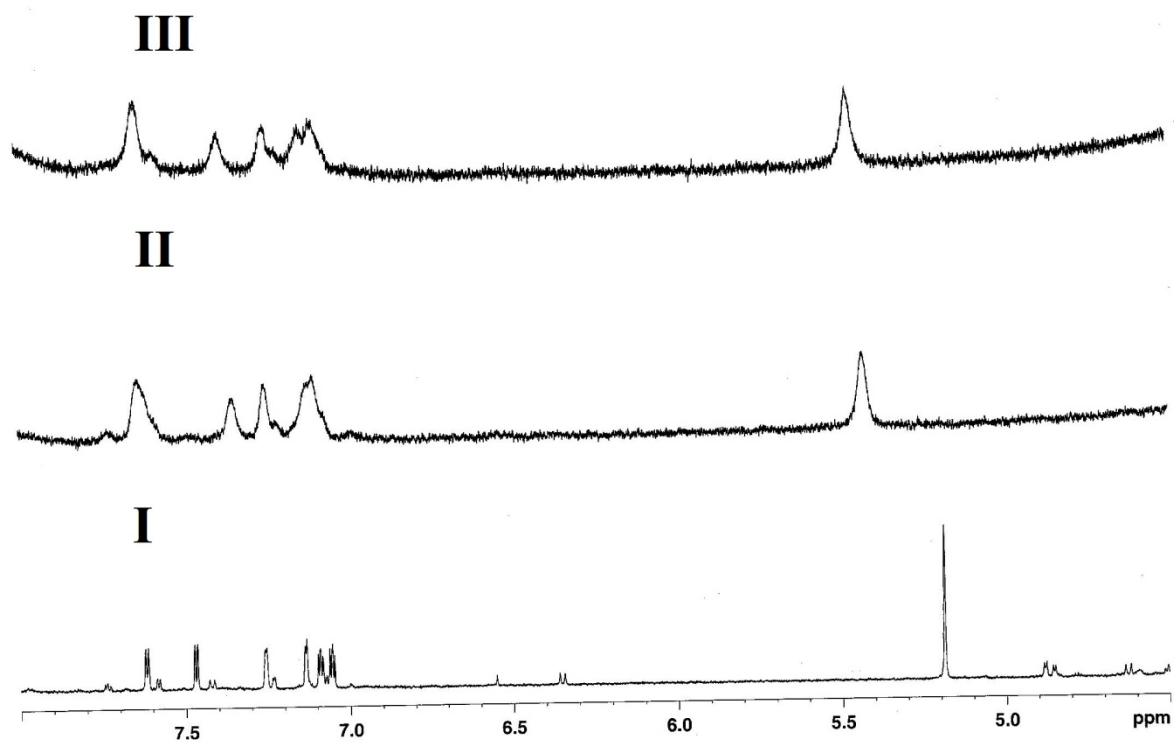

**Figure S14.** <sup>1</sup>H NMR spectra of PTA with Fe<sup>3+</sup> in DMSO-d<sub>6</sub>: (I) only PTA; (II) PTA with 1 equiv. of Fe<sup>3+</sup>; (III) PTA with 2.0 equiv. of Fe<sup>3+</sup>.

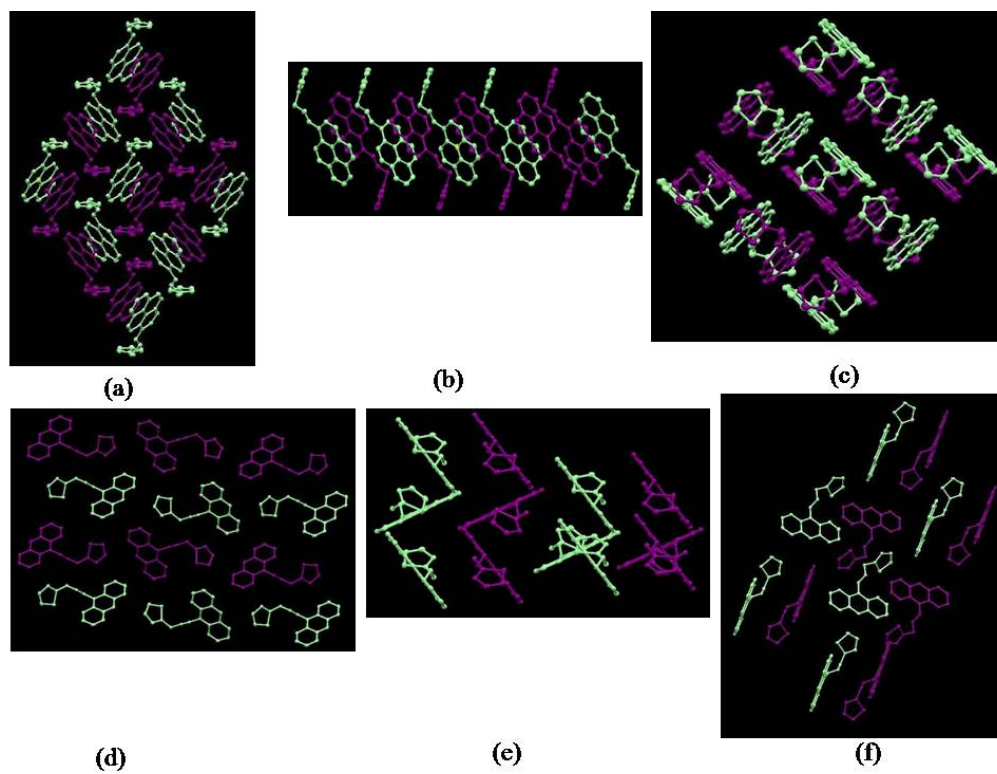

**Figure S15.** Crystal packing diagram of **PTA** (a), (b) and (c) and **ANTA** (d), (e) and (f) along three different axis a, b and c respectively.

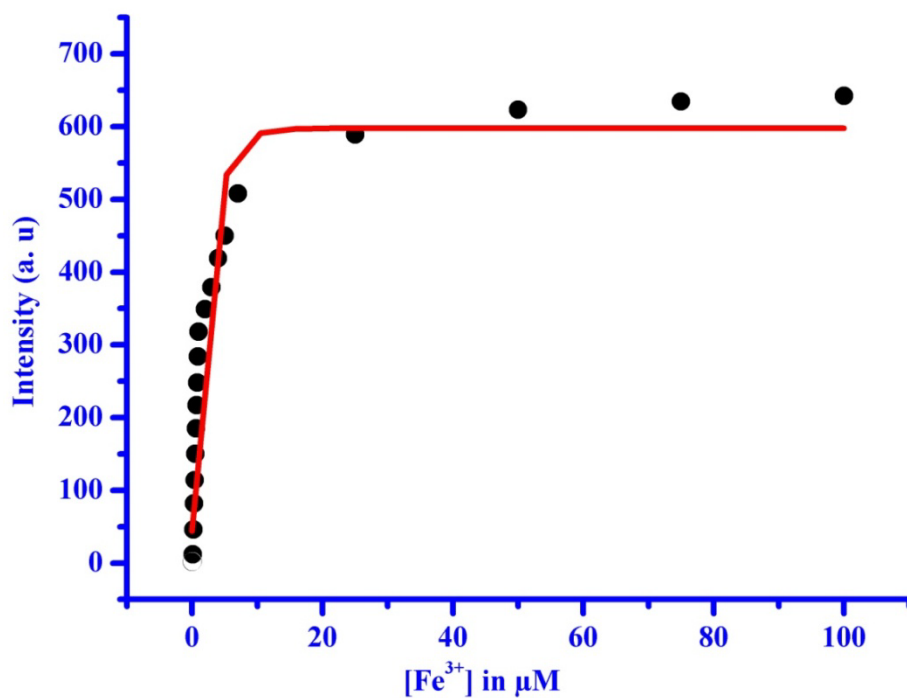

**Figure S16.** Plot of fluorescence intensity vs. externally added  $[\text{Fe}^{3+}]$  (1-100  $\mu\text{M}$ )

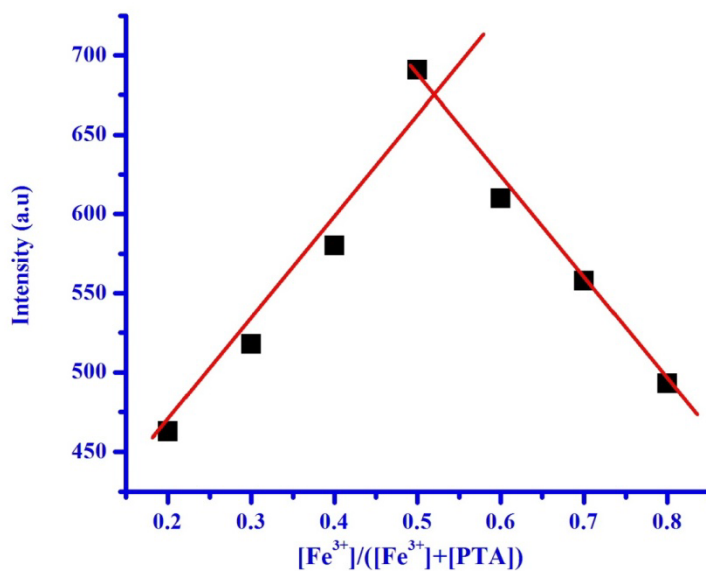

**Figure S17.** Job's plot for determination of stoichiometry of the  $[\text{PTA}-\text{Fe}^{3+}]$  system.

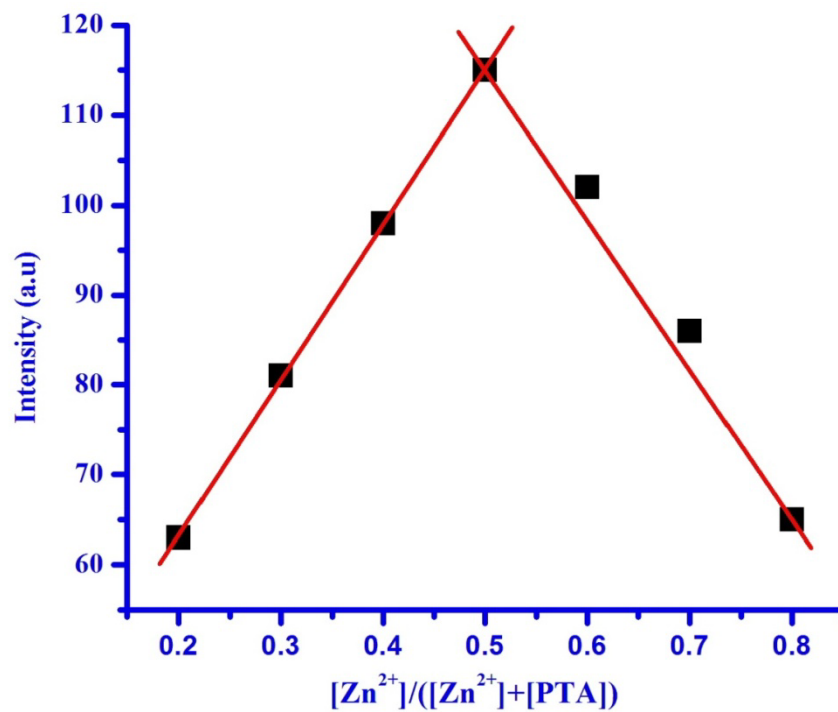

**Figure S18.** Job's plot for determination of stoichiometry of the [PTA-Zn<sup>2+</sup>] system

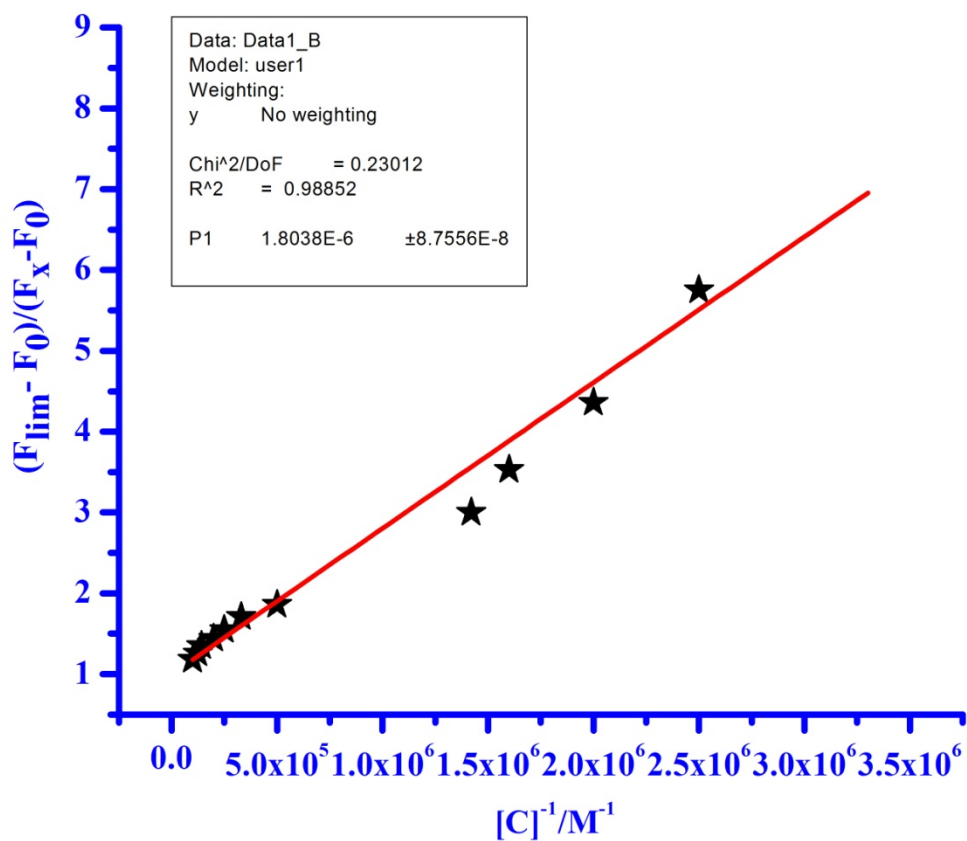

**Figure S19.** Determination of the binding constant of **PTA** with Fe<sup>3+</sup> using  $(F_{\max} - F_0)/(F_x - F_0) = 1 + (1/K) \times (1/[M]^n)$ , where  $F_{\max}$ ,  $F_0$  and  $F_x$  are fluorescence intensities of **PTA** in presence of Fe<sup>3+</sup> at saturation, free **PTA** and at any intermediate Fe<sup>3+</sup> concentration, respectively.

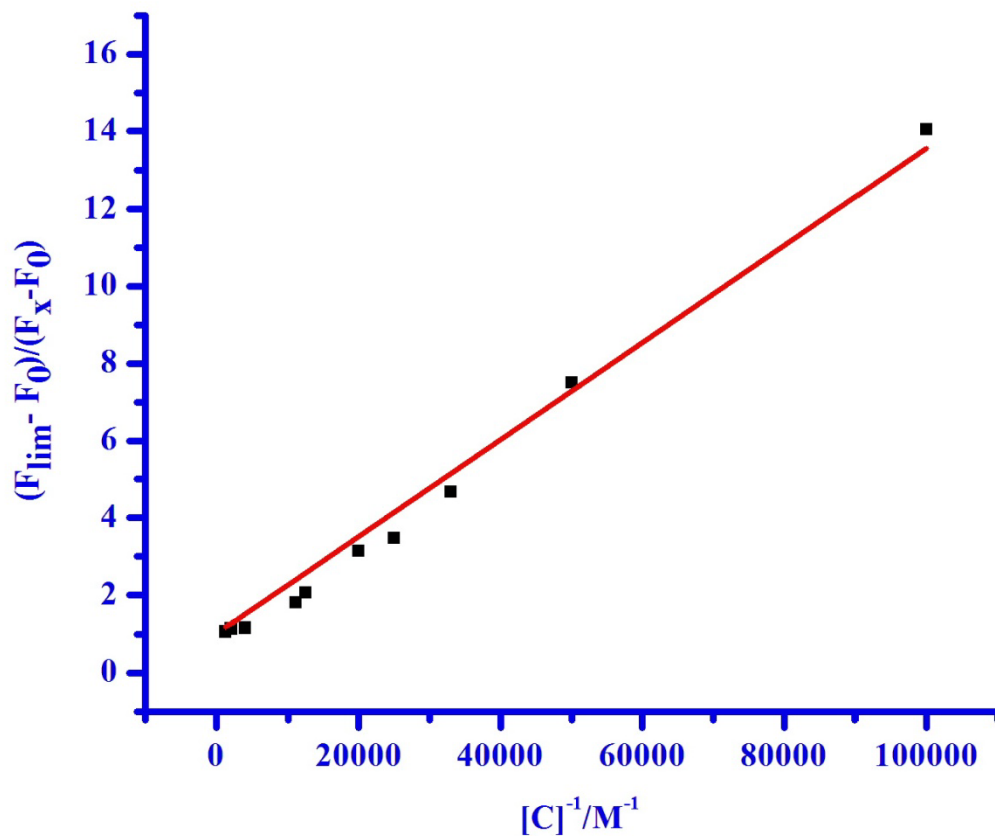

**Figure S20.** Determination of the binding constant of **PTA** with  $Zn^{2+}$  using  $(F_{max} - F_0)/(F_x - F_0) = 1 + (1/K) \times (1/[M]^n)$ , where  $F_{max}$ ,  $F_0$  and  $F_x$  are fluorescence intensities of **PTA** in presence of  $Zn^{2+}$  at saturation, free **PTA** and at any intermediate  $Zn^{2+}$  concentration, respectively.

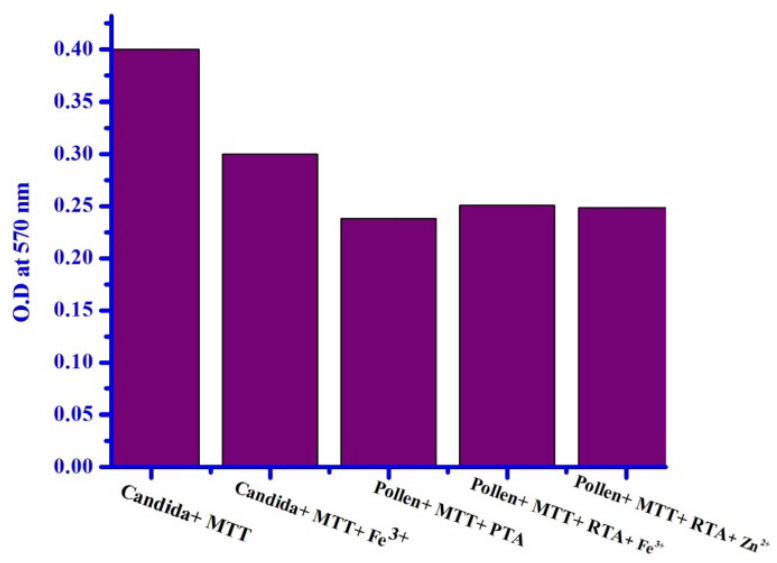

**Figure S21.** MTT assay studies of PTA.

## References

1. E. Austin, M. Gouterman, *Bioinorg. Chem.*, 1978, **9**, 281.
2. W. H. Melhuish, *J. Phys. Chem.*, 1961, **65**, 229.
3. J. V. Houten, R. J. Watts, *J. Am. Chem. Soc.*, 1976, **98**, 4853.
4. G. L. Long, J. D. Winefordner, *Anal. Chem.*, 1983, **55**, 712A.
